# Supplementary material for: Origin of charge density wave in topological semimetals SrAl4 and EuAl4
Source: Springer Nature journal article supplement (doi:10.1038/s42005-024-01600-1), 2024-03-29
Supplement: 42005_2024_1600_MOESM2_ESM.pdf [file 42005_2024_1600_MOESM2_ESM.pdf]

## **Supplementary Information**

# **Origin of Charge Density Wave in Topological Semimetals SrAl<sub>4</sub> and EuAl<sub>4</sub>**

Lin-Lin Wang<sup>1\*</sup>, Niraj K. Nepal<sup>1</sup> and Paul C. Canfield<sup>1,2</sup>

<sup>1</sup>Ames National Laboratory, U.S. Department of Energy, Ames, IA 50011, USA

<sup>2</sup>Department of Physics and Astronomy, Iowa State University, Ames, IA 50011, USA

[\\*llw@amelsab.gov](mailto:*llw@amelsab.gov)

|                   |                   | $a$ (Å) | $c$ (Å) | $z$     | $4e-4e$ (Å) | $4d-4e$ (Å) |
|-------------------|-------------------|---------|---------|---------|-------------|-------------|
| SrAl <sub>4</sub> | Expt <sup>1</sup> | 4.461   | 11.209  | 0.3841  | 2.598       | 2.690       |
|                   | PBE+SOC           | 4.456   | 11.250  | 0.3838  | 2.616       | 2.688       |
|                   | $\delta$ (%)      | -0.11   | +0.37   | -0.08   | +0.69       | -0.07       |
| BaAl <sub>4</sub> | Expt <sup>2</sup> | 4.566   | 11.250  | 0.3800  | 2.700       | 2.711       |
|                   | PBE+SOC           | 4.562   | 11.326  | 0.3812  | 2.691       | 2.722       |
|                   | $\delta$ (%)      | -0.09   | +0.68   | +0.32   | -0.33       | +0.41       |
| EuAl <sub>4</sub> | Expt <sup>3</sup> | 4.402   | 11.163  | 0.380   | 2.679       | 2.636       |
|                   | PBE+SOC           | 4.380   | 11.186  | 0.3853  | 2.565       | 2.662       |
|                   | $\delta$ (%)      | -0.50   | +0.21   | +1.39   | -4.26       | +0.99       |
| SrGa <sub>4</sub> | Expt <sup>4</sup> | 4.4474  | 10.7300 | 0.38299 | 2.511       | 2.642       |
|                   | PBE+SOC           | 4.502   | 10.807  | 0.3822  | 2.546       | 2.666       |
|                   | $\delta$ (%)      | +1.22   | +0.72   | -0.21   | +1.39       | +0.91       |
| BaGa <sub>4</sub> | Expt <sup>5</sup> | 4.5661  | 10.7780 | 0.3799  | 2.589       | 2.678       |
|                   | PBE+SOC           | 4.621   | 10.835  | 0.3788  | 2.627       | 2.699       |
|                   | $\delta$ (%)      | +1.20   | +0.53   | -0.29   | +1.47       | +0.78       |

Supplementary Table 1. Fully relaxed lattice parameters and the distances between different sites ( $4e-4e$  and  $4d-4e$ ) for all the five compounds in comparison to the experimental data. The relaxations are performed in PBE exchange-correlation functional with spin-orbit coupling (SOC).

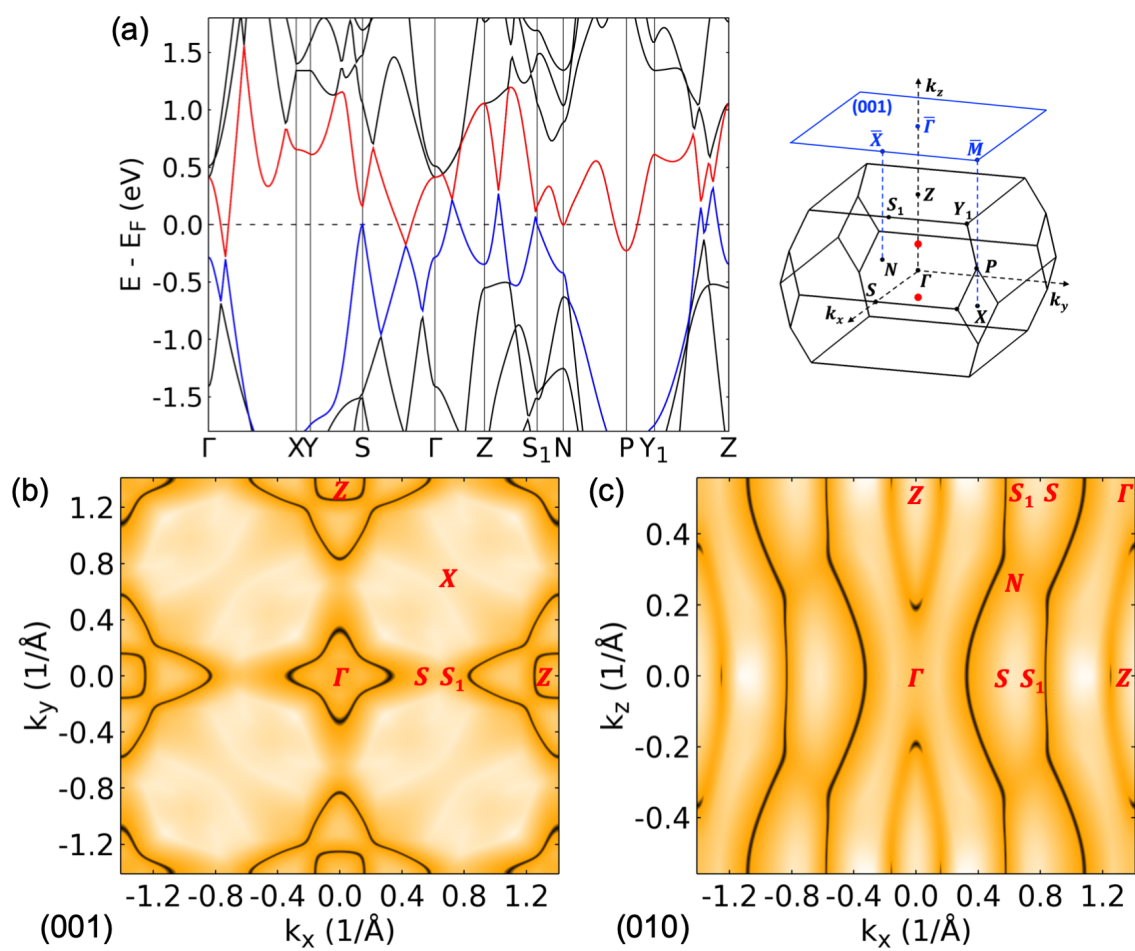

Supplementary Figure 1. Bulk band structure of SrAl<sub>4</sub> without SOC and the nodal lines with zero gap on more planes in addition to that in Fig.1(e). (a) Calculated SrAl<sub>4</sub> band structure without SOC. The top valence and conduction bands are in blue and red, respectively, with bulk Brillouin zone shown on the right. (b) Nodal lines on the (001) plane shown by the zero gap. (c) Nodal lines on the (010) plane shown by the zero gap.

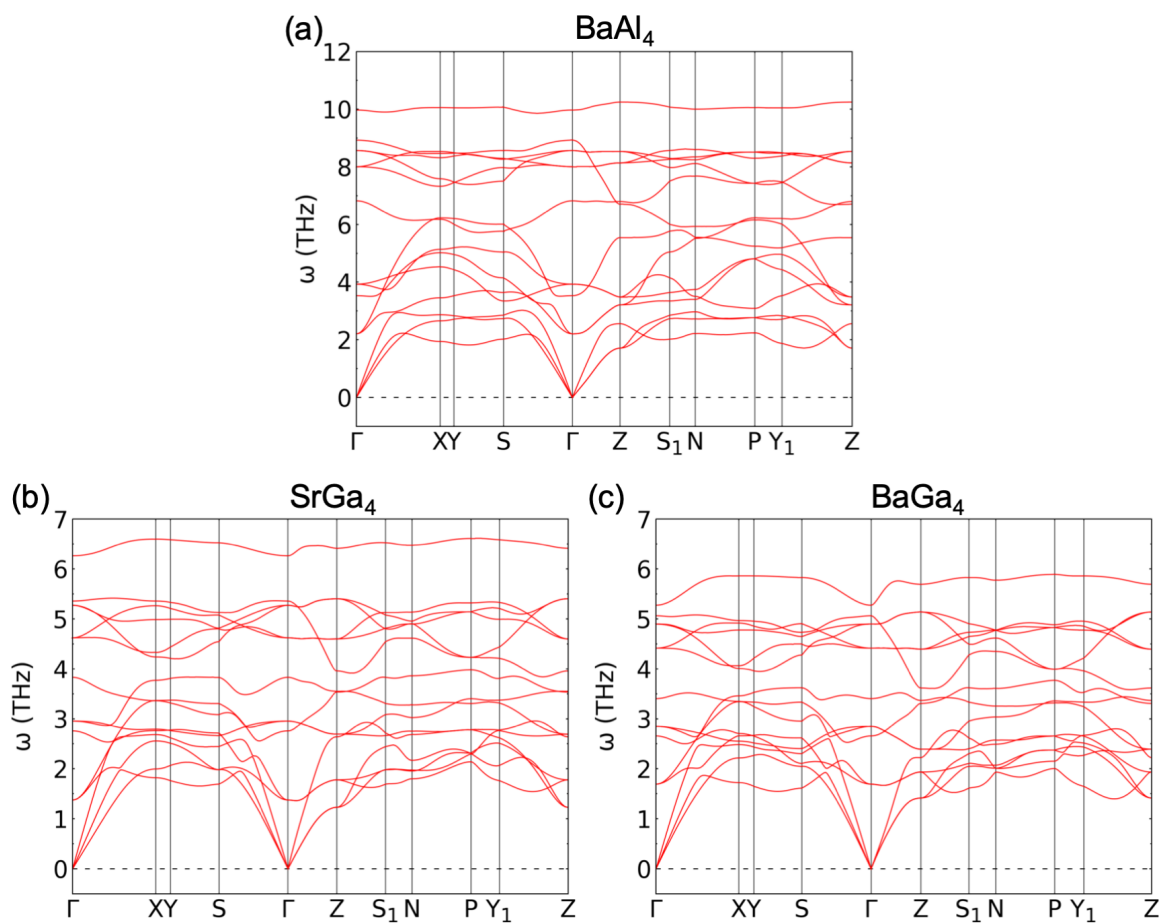

Supplementary Figure 2. Phonon band dispersion of (a) BaAl<sub>4</sub>, (b) SrGa<sub>4</sub> and (c) BaGa<sub>4</sub>.

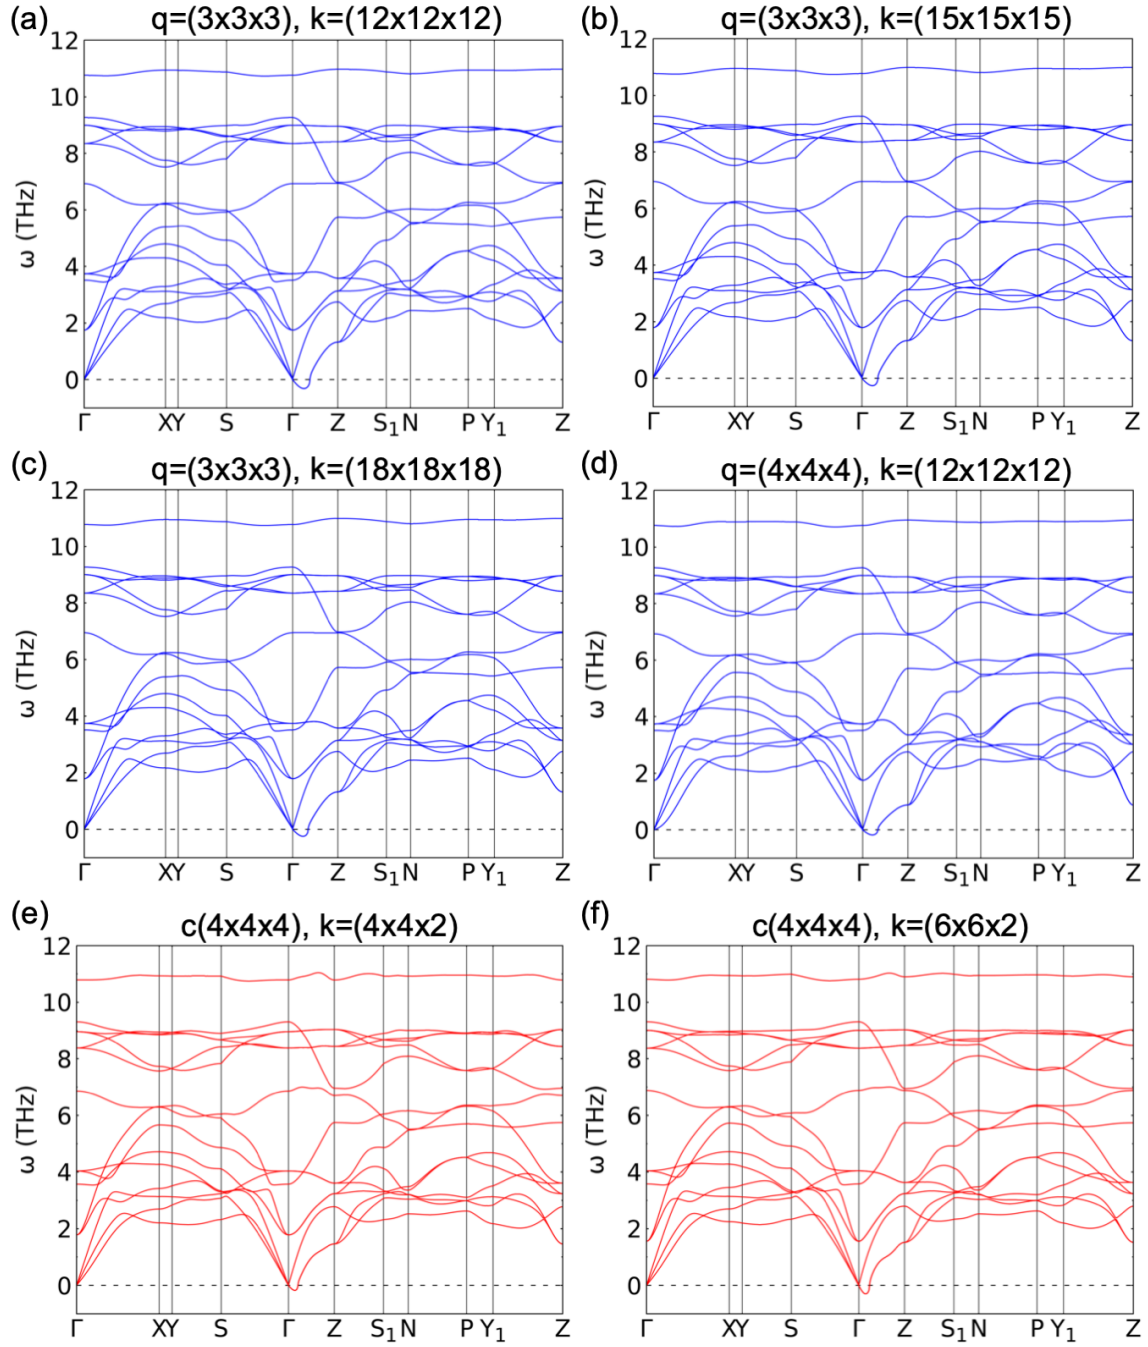

Supplementary Figure 3. The convergence of calculated phonon band dispersions of SrAl<sub>4</sub>. (a-d) The phonon calculated in QE using DFPT with respect to increasing  $k$ -mesh and  $q$ -mesh as labeled. (e-f) The phonon calculated in VASP using the finite displacement method with increasing  $k$ -mesh as labeled for a large supercell of  $c(4 \times 4 \times 4)$  with 640 atoms. All the calculated phonon bands show the imaginary transverse acoustic mode at the small  $q$ -vector along the  $\Gamma$ -Z direction, as discussed in the main text.

## Supplementary References

1. S. Gobel, M. Somer, W. Carrillo-Cabrera, E.-M. Peters, K. Peters, H. G. von Schnering, Crystal structure of strontium tetraaluminium, SrAl<sub>4</sub>. **211**, 189-189 (1996).
2. F. A. Ainutdinov, S. K. Khairidinov, A. V. Vakhobov, Phase diagram of the system aluminum-barium-nickel. *Dokl. Akad. Nauk Tadzh. SSR* **30**, 169-172 (1987).
3. T. I. Yamson, M. B. Manyako, O. S. Zarechnyuk, Features of component interaction in the ternary (Ca, Eu, Sr)-Cu-Al systems. *Russ. Metall.*, 161-165 (1992).
4. P. H. Tobash, Y. Yamasaki, S. Bobev, Strontium tetragallide. *Acta Crystallographica Section E* **61**, i174-i176 (2005).
5. X. Sun, G. Lu, L. Chen, R. Ling, BaGa<sub>4</sub> X-ray powder diffraction structure analysis. *Hangzhou Daxue Xuebao, Ziran Kexueban* **18**, 55-59 (1987).
